# Supplementary material for: Living Algal Community Voucher and Taxonomy in Dickinson County Iowa: A Case for Collection-Based Research
Source: MDPI journal article supplement (doi:10.3390/d16010021), 2023-12-27
Supplement: s1 [file s1]

Archive with 3 entries (3 files):
- Supplemental Figure S1 Tiffany archives.pdf
- Supplemental Table S1 Tiffany archives.pdf
- Supplemental Table S2 KMJ_1_4_24.pdf
