# Supplementary material for: Living Algal Community Voucher and Taxonomy in Dickinson County Iowa: A Case for Collection-Based Research
Source: MDPI journal article supplement (doi:10.3390/d16010021), 2023-12-27
Supplement: s1 [file s1]

**Table S1.** Algal taxa from nine sites in Dickinson County Iowa transcribed from archives of L.H. Tiffany's handwritten documents from 1915. Taxa with an asterisk (\*) were found in current samples from the same site. Taxa denoted by a cross (†) were found in current samples from a different site.

### Center Lake

*Chaetophora elegans* †  
*Cladophora glomerata* †  
*Coleochaete scutata*  
*Cosmarium* sp.  
*Cylindrocapsa geminella* var. *minor*  
*Desmids* \* †  
*Diatoms* \* †  
*Gloeotrichia echinulata* †  
*Hydrodictyon reticulatum* †  
*Lyngbya aestuarii*  
*Melosira varians* \*  
*Microcystis aeruginosa* †  
*Microcystis aeruginosa* var. *major*  
*Mougeotia genuflexa* f.  
*Nostoc caeruleum*  
*Oedogonium crassivriculum*  
*idioavdrosporum* f.  
*Oedogonium cyathigerum* f.  
*Oedogonium crispum* f.  
*Oedogonium oblongum* f.  
*Oedogonium franklinianum* f.  
*Oedogonium capilliforme*  
*Oedogonium areolatum* f.  
*Oedogonium fragile* f.  
*Oedogonium exocostatum* f.  
*Oedogonium dictyosporum* f.  
*Oedogonium macrospermum* f.  
*Oedogonium iorvense* f.  
*Oedogonium capilliforme debaryanum* f.  
*Oedogonium supremum* f.  
*Oedogonium cardiacum carbonicum* f.  
*Ophiocytium cochleare*

*Ophiocytium parvulum*  
*Pandorina morum*  
*Pediastrum* sp.  
*Pediastrum boryanum*  
*Pediastrum duplex*  
*Rhizoclonium hieroglyphicum*  
*Rhizoclonium fontanum*  
*Rhizoclonium bombycinum*  
*Scenedesmus* sp.  
*Spirogyra crassa* f.  
*Spirogyra daedalea* f.  
*Spirogyra majuscula* f.  
*Spirogyra decimina* var. *inflata* f.  
*Spirogyra novae-angliae* f.  
*Spirogyra fluviatilis* f.  
*Spirogyra decimina* f.  
*Tribonema bombycinum*  
*Tribonema bombycinum* var. *tenuis*  
*Tribonema minor*  
*Tribonema utriculosum*  
*Zygnema cruciatum* f.

### Kettlehole

*Bulbochaete intermedia*  
*Bulbochaete congener*  
*Chaetophora incrassata*  
*Cylindrocapsa geminella* var. *minor*  
*Mougeotia nummuloides*  
*Oedogonium hystricinum*  
*Oedogonium verrucosum*  
*Oedogonium crispum*  
*Oedogonium crenulata-costatum*  
*Oedogonium borisianum*  
*Oedogonium oblongum*

*Oedogonium landsborouglin*  
*Oedogonium aerosporum*  
*Oedogonium borisianum*  
*Oedogonium gracillimum*  
*Oedogonium decipens*  
*Oedogonium pisanum* var. *gracilis*  
*Oedogonium concatenum* f. *hutchinsiae*  
*Spirogyra tenuissima*  
*Stigeoclonium absecundum*  
*Ulothrix zonata*

### Emerson Bay

*Cladophora glomerata* †  
*Cocconema* sp.  
*Coleochaete scutata*  
*Desmids* †  
*Diatoms*\* †  
*Gomphonema* sp. †  
*Oedogonium crassivriculum idioavdrosporum* f.  
*Oedogonium oblongum* f.  
*Oedogonium grande*  
*Oedogonium grande robusta* f.  
*Oedogonium crispum* f.  
*Oedogonium plagiosomum* f.  
*Oedogonium capilliforme* f.  
*Rhizoclonium hieroglyphicum*  
*Spirogyra majuscula* f.  
*Spirogyra tenuissima*  
*Spirogyra fluviatilis* f.  
*Stigeoclonium subsecundum*  
*Tolypothrix tenuis*  
*Tribonema bombycinum*

### Millers Bay

*Cladophora glomerata* \*\*  
*Diatoms* \*\*  
*Oedogonium capilliforme* f.  
*Oscillatoria princeps*  
*Oscillatoria agardhii*  
*Spirogyra decimina* f.  
*Spirogyra majuscula* f.  
*Spirogyra* spp. †  
*Tetraspora lubrica*  
*Tribonema bombycinum*  
*Tribonema bombycinum* var.  
*tenue*  
*Tribonema utriculosum*

#### **Gar Lake**

*Anabaena circinalis*  
*Cladophora glomerata* †  
*Lyngbya estuarii*  
*Rhizoclonium hookeri*

#### **Big Spirit Lake**

*Anabaena circinalis*  
*Cladophora glomerata* †  
*Diatoms* \*\*  
*Gloeotrichia echinulata* †  
*Lyngbya estuarii*  
*Mycrocystis aeruginosa* †  
*Scytonema crispum*

#### **West Okoboji Lake**

*Cylindrocapsa geminella*  
*Hydrodictyon reticulatum* †  
*Oedogonium pringsheimii*  
*nordstedtii* f.  
*Oedogonium crispum* f.  
*Oscillatoria princeps*  
*Pithophora varia*  
*Rhizoclonium hieroglyphicum*  
*Spirogyra strictica* f.  
*Stigeoclonium stagnatile*

*Stigeoclonium subsecundium*  
*Tolypothrix tenuis*  
*Tribonema bombycinum*

#### **Okoboji Lake**

*Aphanochaete repens*  
*Cladophora glomerata* †  
*Gomphonema* sp. †  
*Hydrodictyon reticulatum* †  
*Lyngbya estuarii*  
*Oedogonium* spp. †  
*Rhizoclonium hieroglyphicum*  
*Spirogyra strictica* f.  
*Spirogyra strictica* f. var.  
*serobiculata*  
*Stigeoclonium subsecundium*

#### **East Okoboji Lake**

*Stigeoclonium tenue*
