# Supplementary material for: Living Algal Community Voucher and Taxonomy in Dickinson County Iowa: A Case for Collection-Based Research
Source: MDPI journal article supplement (doi:10.3390/d16010021), 2023-12-27
Supplement: s1 [file s1 › Supplemental Table S2 KMJ_1_4_24.pdf]

**Table S2.** Algal taxa documented in 2017 study at eight sites in Dickinson County Iowa.

| <b>Center Lake</b>                   | <b>Freda Haffner Kettlehole State Preserve</b>        | <b>Big Spirit Lake</b>                  |
|--------------------------------------|-------------------------------------------------------|-----------------------------------------|
| <i>Closterium ehrenbergii</i>        | <i>Closterium gracile</i>                             | <i>Aulacoseira</i> sp. 1                |
| <i>Cosmarium subcrenatum</i>         | <i>Closterium parvulum</i>                            | <i>Aulacoseira</i> sp. 2                |
| <i>Diatoma vulgaris</i>              | <i>Closterium</i> cf. <i>dianae</i> var. <i>minus</i> | <i>Chaetophoropsis elegans</i>          |
| <i>Dolichospermum circinale</i>      | <i>Cystodinium</i> cf. <i>cornifax</i>                | <i>Characiopsis</i> sp.                 |
| <i>Dolichospermum viguieri</i>       | <i>Eunotia bilunaris</i>                              | <i>Diatoma vulgaris</i>                 |
| <i>Fragilaria</i> sp.                | <i>Glaucocystis nostochinearum</i>                    | <i>Gomphosphaeria</i> sp.               |
| <i>Gomphonema</i> sp.                | <i>Monomorphina</i> sp.                               | <i>Klebsormidium</i> cf. <i>mucosum</i> |
| <i>Melosira varians</i>              | <i>Phacus acuminatus</i>                              | <i>Micractinium</i> sp.                 |
| <i>Scenedesmus quadricauda</i>       | <i>Phacus orbicularis</i>                             | <i>Monactinus simplex</i>               |
| <i>Spirogyra</i> sp. 1               | <i>Pleurotaenium</i> cf. <i>ehrenbergii</i>           | <i>Stephanodiscus reineri</i>           |
| <i>Spirogyra</i> sp. 2               | <i>Trachelomonas armata</i>                           |                                         |
| <i>Stigeoclonium lubricum</i>        | <i>Xanthidium uncinatum</i>                           |                                         |
| <i>Woronichinia naegeliana</i>       |                                                       |                                         |
| <b>Emerson Bay</b>                   | <b>Millers Bay</b>                                    | <b>East Okoboji Lake</b>                |
| <i>Cladophora</i> sp.                | <i>Chamaesiphon incrustans</i>                        | <i>Cladophora glomerata</i>             |
| <i>Cymbella mexicana</i>             | <i>Cladophora glomerata</i>                           | <i>Cocconeis pediculus</i>              |
| <i>Gloeotrichia echinulata</i>       | <i>Encyonema</i> sp.                                  | <i>Draparnaldia acuta</i>               |
| <i>Microcystis aeruginosa</i>        | <i>Gloeotrichia echinulata</i>                        | <i>Gomphonema</i> sp.                   |
| <i>Quadrigula chodatii</i>           | <i>Gomphonema</i> sp.                                 |                                         |
| <i>Spirogyra</i> sp. 3               | <i>Oedogonium</i> sp.                                 |                                         |
| <i>Spirogyra</i> sp. 4               |                                                       |                                         |
| <i>Spirogyra</i> sp. 5               |                                                       |                                         |
| <i>Tribonema</i> sp.                 |                                                       |                                         |
| <b>West Okoboji Lake</b>             | <b>Upper Gar Lake</b>                                 |                                         |
| <i>Cladophora</i> sp.                | <i>Hydrodictyon reticulatum</i>                       |                                         |
| <i>Cocconeis</i> sp.                 | <i>Oedogonium</i> sp.                                 |                                         |
| <i>Cymbella mexicana</i>             |                                                       |                                         |
| <i>Leptolyngbya</i> sp.              |                                                       |                                         |
| <i>Navicula</i> sp.                  |                                                       |                                         |
| <i>Oedogonium</i> sp. 2              |                                                       |                                         |
| <i>Spirogyra</i> cf. <i>borgeana</i> |                                                       |                                         |
| <i>Spirogyra</i> sp.                 |                                                       |                                         |
