# Supplementary figures and images for: Living Algal Community Voucher and Taxonomy in Dickinson County Iowa: A Case for Collection-Based Research
Source: MDPI journal article supplement (doi:10.3390/d16010021), 2023-12-27

**Figure S1.** Image of L.H. Tiffany's handwritten algal records.

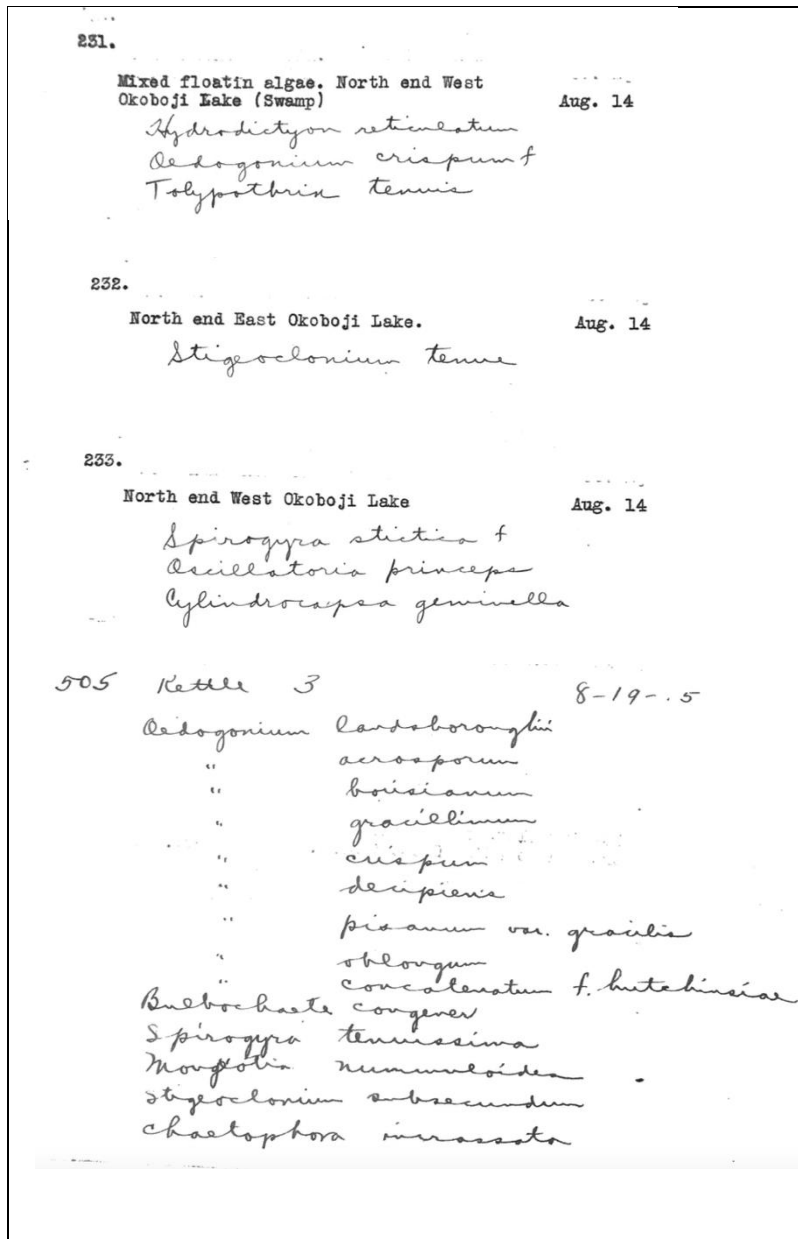

Supplement: s1 [file s1 › Supplemental Figure S1 Tiffany archives.pdf]
